# Supplementary material for: Antielectrostatically hydrogen bonded anion dimers: counter-intuitive, common and consistent
Source: Royal Society of Chemistry journal article supplement (doi:10.1039/c9ce01118h), 2019-01-01
Supplement: c9ce01118h1.xlsx [file c9ce01118h1.xlsx]

## Sheet: HCO3
HCO3- (all structures)
CSD Refcode	DIST1	DIST2		Number of structures	118
QISGOR	2.591	2.595		Number of distances	254
QISGOR	2.639	2.622		Minimum	2.528
XIWJIZ	2.593	2.593		Maximum	2.844
XIWRAZ	2.607	2.607		Median	2.605
YIPTOJ	2.636	2.636		Mean	2.6064
ZIGHUV	2.631	2.631		Standard deviation (n-1)	0.037142
ASOXAJ	2.562	2.638		SE of mean	0.0023305
AXACEI	2.668	2.668
AXACEI01	2.659	2.659
BASPAN	2.681	2.681
BEBGAT01	2.582	2.582
BICWEQ	2.601	2.601
BICWIU	2.651	2.651
COFFUZ	2.582	2.582
COFFUZ01	2.583	2.583
CONMOJ	2.606	2.606
COTPRH	2.596	2.596
DAHJIH	2.585	2.585
DEDQIO	2.664	2.664
DEFJED	2.637	2.637
DIZVIS	2.632	2.632
DUFSIG	2.639	2.639
DUMPUW	2.595	2.595
EFAKAA	2.537	2.537
EPADEG	2.537	2.564
FAVQIE	2.627	2.627
FAXBAJ	2.582	2.582
FAXBAJ	2.625	2.625
FEHQIV	2.59	2.584
FEMQIY	2.617	2.617
FISQOP	2.635	2.635
GILCIP	2.627	2.627
GIMYOR	2.599	2.599
HAKLEL	2.609	2.609
HAKLEL01	2.605	2.605
HAKLIP	2.609	2.609
HEGLUD	2.592	2.592
HEQWOR	2.58	2.58
ICELIN	2.844	2.844
IDIHIN	2.642	2.642
IPHCIR	2.648	2.648
IQAPIA	2.599	2.599
IQAPOG	2.603	2.603
IQAPUM	2.621	2.621
IQAQAT	2.598	2.598
IQAQEX	2.618	2.618
IQAQIB	2.589	2.589
IQAQUN	2.592	2.588
ITEMEA	2.646	2.646
ITEMIE	2.639	2.586
IWEGIB	2.584	2.584
KIFVUR	2.572	2.572
KIFVUR	2.614	2.614
KUPZAY	2.634	2.634
LIHZIN	2.643	2.643
LILQOM	2.612	2.612
LORRIT	2.569	2.569
LUQFOT	2.605	2.605
LUQFUZ	2.601	2.601
LUXHAN	2.587	2.587
MIMHAR	2.62	2.584
MULDAZ	2.609	2.609
NAJZUU	2.596	2.584
NIJWIP	2.64	2.64
NIJXAI	2.615	2.615
NIJXEM	2.615	2.615
OBEKOY	2.558	2.558
OBEKOY	2.59	2.59
OBEKOY01	2.572	2.583
OMIFEV	2.584	2.584
OTAHUN	2.624	2.624
PADQIW	2.552	2.552
PADQUI	2.528	2.528
PEJTEG	2.66	2.66
PIBNAP10	2.569	2.569
PIVPIT	2.65	2.65
POGKIG	2.64	2.659
PUFGII	2.615	2.615
QIFFIU	2.569	2.563
QIFFIU	2.582	2.581
QIFFOA	2.554	2.59
REGVEF	2.618	2.618
REJVIM	2.593	2.593
REKYUD	2.562	2.562
RUYWIS	2.627	2.627
SOVVIK	2.605	2.605
TAXZOJ	2.607	2.607
TAXZUP	2.582	2.582
TAYBAY	2.585	2.585
TEFZIN	2.614	2.614
TIJSAI	2.6	2.626
TIJSAI	2.609	2.609
TIJSEM	2.545	2.588
TIJSEM	2.635	2.635
TIMBOI	2.609	2.609
TORQIA	2.566	2.569
TORQOG	2.619	2.619
TURRUU	2.635	2.635
TUTSIK	2.629	2.6
UGUKAI	2.582	2.582
VEHPIK	2.611	2.613
VELLUW	2.624	2.624
VISWOL	2.551	2.551
VOGBID	2.563	2.563
WAPJOP	2.561	2.561
WAYGAG	2.536	2.536
WECTAB	2.602	2.602
WIFYES	2.618	2.618
WIGKIH	2.585	2.585
WILJUX	2.575	2.612
XABLAQ	2.614	2.607
XABLAQ01	2.61	2.603
XAYJUF	2.647	2.647
XIFCAT	2.582	2.582
XOGLUA	2.627	2.627
YAWQIZ	2.629	2.629
YEFBUI	2.678	2.678
YEFCET	2.602	2.602
YUPVUC	2.613	2.64
ZEBQII	2.576	2.576
ZEBQII	2.584	2.582
ZEBQOO	2.58	2.58
ZEBQOO	2.599	2.601
ZEBQUU	2.563	2.554
ZEBRAB	2.608	2.57
ZERPUH	2.576	2.576
ZERQES	2.641	2.641

## Sheet: H2PO4
H2PO4- (all structures)		Structures in rows 4 -424 result from the left-hand search in Fig S2. Structures in row 425-474 result from the right-hand search in Fig S2.
CSD Refcode	DIST1	DIST2		Number of structures	331
BIPBOU	2.633	2.633		Number of distances	942
JIXQEP	2.625	2.676		Minimum	2.433
JIXQEP	2.63	2.588		Maximum	2.845
SOBLED	2.582	2.582		Median	2.585
SOBLIH	2.589	2.589		Mean	2.58508
XIYQOO	2.574	2.574		Standard deviation (n-1)	0.0474809
YIPVEB	2.549	2.549		SE of mean	0.00154701
YIPVEB	2.558	2.558
ZEWZOT01	2.621	2.621
ZIYDOD	2.605	2.554
ACUXIG	2.595	2.653
ACUXIG	2.572	2.572
ACUXIG	2.588	2.588
AGUAHP01	2.521	2.521
AGUAHP01	2.516	2.516
AJUKUL	2.68	2.642
AKEMOU	2.595	2.595
AKEMOU	2.589	2.589
ALORUQ	2.575	2.628
ALORUQ	2.614	2.509
AMIMCC	2.638	2.61
AMPETP	2.557	2.61
ASOWUC	2.529	2.542
ASOWUC	2.63	2.553
ASOWUC	2.642	2.54
BENNIU	2.672	2.672
BIDPEJ	2.591	2.591
BIDPEJ	2.562	2.562
BIDVUG	2.556	2.556
BIKRIZ	2.569	2.569
BOJYAB	2.618	2.618
BOJYAB	2.603	2.603
BOQJEW	2.565	2.565
CAHSUA	2.604	2.635
CEBRAD	2.608	2.673
CEXPAX	2.642	2.616
CEXYEM	2.472	2.55
CITYOU	2.563	2.563
CIXHEX	2.531	2.531
CLQUON01	2.56	2.617
CLQUON01	2.509	2.603
COFQAQ01	2.594	2.594
COGMIV	2.64	2.616
CPAIMZ	2.552	2.552
CPAIMZ	2.535	2.535
DAMVOD	2.625	2.625
DAMVOD01	2.638	2.638
DAMWAQ	2.623	2.623
DASNUH	2.524	2.528
DASNUH	2.635	2.589
DAVVED	2.494	2.631
DAVVED	2.529	2.62
DAYHOB	2.547	2.52
DAYHOB	2.475	2.543
DAZJUL	2.51	2.585
DAZJUL	2.555	2.538
DAZJUL	2.514	2.522
DAZJUL	2.741	2.553
DAZJUL	2.433	2.557
DESNAR	2.576	2.55
DOXBAT	2.606	2.606
DOXJOP	2.568	2.568
DOXSUF	2.596	2.596
DOXSUF	2.641	2.641
DOXSUF	2.51	2.577
DUNHID	2.542	2.542
DUNHID	2.556	2.556
DUSKAE	2.565	2.602
EBECAS	2.586	2.586
EBECEW	2.614	2.614
EBECIA	2.565	2.565
EBEFAV	2.593	2.593
EDUQUP	2.559	2.64
EJEGAB	2.567	2.567
EJEGAB	2.539	2.539
ELEVOI	2.604	2.604
ELOQUT	2.613	2.613
EPHDHP	2.554	2.554
EPHDHP01	2.547	2.547
ESAJIT	2.547	2.547
ESAJOZ	2.565	2.565
ESAJOZ	2.573	2.573
ESAJUF	2.543	2.543
ESAJUF	2.575	2.575
ESAKAM	2.585	2.585
ESAMES	2.644	2.729
EVALAP	2.613	2.546
EXUQIY	2.533	2.516
EYUTEZ	2.509	2.462
EZAGAN	2.641	2.642
FACWOX	2.676	2.676
FASVAY	2.633	2.633
FEDMIL	2.584	2.584
FEDMIL	2.608	2.608
FIJHEL	2.542	2.606
FITZOY	2.589	2.559
GEJYEA	2.57	2.57
GEJYEA	2.609	2.609
GEJYEA01	2.567	2.567
GEJYEA01	2.614	2.614
GEJYEA02	2.569	2.569
GEJYEA02	2.603	2.603
GEXRUW	2.637	2.648
GEXXAI	2.516	2.597
GEXXAI	2.566	2.617
GEXXAI01	2.471	2.62
GEXXAI01	2.59	2.624
GEXXAI02	2.533	2.558
GEXXAI02	2.575	2.59
GEYVUE	2.553	2.553
GEYVUE	2.548	2.548
GEYWUF	2.623	2.587
GICROB	2.603	2.563
GOLTOQ	2.556	2.556
GOLTOQ	2.668	2.668
GUNYIX	2.647	2.647
HAHBIC	2.637	2.519
HAHBIC01	2.519	2.644
HAHGED	2.606	2.606
HAHGIH	2.599	2.599
HAKDIH	2.547	2.547
HAKDON	2.537	2.537
HAKDUT	2.556	2.609
HARMIY	2.607	2.613
HARMIY	2.542	2.542
HARMIY	2.625	2.625
HEDWUK	2.59	2.664
HEGDED	2.672	2.672
HEGDED	2.582	2.582
HEWZIT	2.605	2.629
HEXRIM	2.612	2.577
HEXRIM	2.625	2.504
HITZAM	2.635	2.635
HOJLOI	2.433	2.433
HOJLOI	2.6	2.6
HOJLOI	2.515	2.528
IMAROE	2.528	2.528
IMOCAO	2.605	2.593
IPRAZP01	2.616	2.616
IQEBAI	2.622	2.622
IQEBAI	2.685	2.685
IQIPON	2.627	2.627
ISOLIM	2.623	2.623
ISUZIF	2.515	2.54
ISUZIF	2.589	2.579
ISUZIF	2.589	2.602
IVUJOA	2.596	2.596
IVUJOA	2.599	2.599
IWOQES	2.572	2.572
IWOQES	2.624	2.624
JAFHON	2.61	2.61
JAFHON	2.543	2.543
JAHMIO	2.607	2.712
JAVJAU	2.573	2.573
JAVJEY	2.555	2.555
JAYXUD	2.661	2.661
JIMSEE	2.602	2.602
JIMSEE	2.605	2.605
JIRXUE	2.566	2.566
JIRYAL	2.556	2.556
JISDOF	2.513	2.513
JOFTUU	2.642	2.642
JUSMER	2.573	2.573
JUSMER	2.622	2.622
JUSMIV	2.533	2.533
JUSMIV	2.628	2.619
JUSMIV	2.617	2.617
JUSMOB	2.587	2.587
JUSMOB	2.605	2.6
JUSMUH	2.505	2.505
KAGCEA	2.567	2.567
KAQSUS	2.546	2.603
KAWMOK	2.58	2.58
KENDOW	2.698	2.698
KENDUC	2.607	2.607
KIDTEY	2.639	2.639
KIDTEY	2.582	2.582
KIDTEY01	2.627	2.627
KIDTEY01	2.57	2.57
KIVHOM	2.586	2.569
KOKBER	2.607	2.601
KOKBER01	2.604	2.604
KOKBER02	2.603	2.603
KUQRIY	2.602	2.602
KUQRIY01	2.593	2.593
KUQROE	2.585	2.585
KUQROE01	2.59	2.59
KUQROE02	2.581	2.581
KUQROE03	2.645	2.56
KUQROE04	2.649	2.548
KURCUW	2.64	2.64
KUZMUO	2.628	2.628
KUZMUO	2.602	2.602
LABRUB	2.567	2.567
LABRUB	2.632	2.632
LEDBAZ	2.591	2.591
LELJOC	2.582	2.582
LELJOC	2.577	2.577
LELXIJ	2.576	2.576
LEMPAX	2.614	2.614
LEMPAX	2.651	2.651
LETLUT	2.613	2.615
LETLUT	2.631	2.592
LETMEE	2.583	2.618
LETMII	2.56	2.56
LETMII	2.651	2.651
LIRZES	2.584	2.734
LIYWOH	2.766	2.766
LOCKUK	2.6	2.6
LOFFIX	2.531	2.531
LOFFIX	2.571	2.571
LOFSOP	2.636	2.636
LOFSOP	2.568	2.568
LOZQIC	2.575	2.575
MALQAS	2.661	2.528
MALQAS	2.576	2.576
MATKAT	2.616	2.541
MENKIA	2.632	2.632
MGUANP10	2.539	2.539
MIFQEX	2.644	2.644
MIKPOM	2.508	2.508
MIKPUS	2.568	2.628
MINVIP01	2.6	2.6
MOMMEI	2.507	2.507
MPHAZP	2.529	2.54
MUVDUE	2.577	2.598
NADGIL	2.548	2.548
NADGIL	2.571	2.571
NADGIL	2.577	2.577
NAHREV	2.491	2.546
NAHREV	2.506	2.506
NAHREV	2.518	2.518
NATNUU	2.578	2.578
NATNUU	2.636	2.636
NATWUC	2.579	2.547
NELVUV	2.478	2.478
NELVUV	2.518	2.518
NELVUV	2.554	2.551
NELVUV	2.505	2.527
NELVUV	2.522	2.449
NELVUV	2.444	2.625
NELVUV	2.528	2.542
NEPBOB	2.55	2.55
NIJXUC	2.563	2.563
NIJXUC	2.544	2.544
NIRFEB	2.604	2.604
NORDAA	2.526	2.526
NORHAE	2.564	2.564
NORHAE	2.52	2.52
NUPXAY	2.568	2.568
OCAWAS	2.593	2.504
OZELIP	2.594	2.604
OZELIP	2.585	2.591
PAMRAX	2.566	2.579
PAMRAX	2.63	2.581
PAVTEN	2.561	2.561
PAZVAO01	2.613	2.478
PIFJAQ	2.646	2.646
PIFJAQ	2.611	2.611
PIKDES	2.617	2.617
PODPII	2.619	2.641
POKHAZ	2.558	2.587
POVLOB	2.623	2.623
POVLOB	2.579	2.579
PROCPH	2.595	2.595
PROCPH	2.538	2.538
PUFHOO	2.574	2.574
PUJTAQ	2.546	2.546
PUJTOE	2.672	2.672
PUTRDP02	2.594	2.594
PUTRDP10	2.584	2.584
PUTRDP11	2.595	2.595
QAJWAB	2.606	2.606
QAJWAB01	2.61	2.538
QAJWAB01	2.569	2.627
QAKWAB	2.577	2.52
QEDHUE	2.571	2.571
QEDHUE	2.533	2.533
QEDHUE01	2.528	2.528
QEDHUE01	2.563	2.563
QESNOS	2.607	2.607
QIFPIG	2.577	2.577
QIFPIG	2.57	2.547
QIFPOM	2.577	2.543
QIFPOM	2.592	2.592
QIFPUS	2.567	2.567
QIFPUS	2.671	2.628
QUBSEM	2.505	2.552
QUBSEM	2.601	2.609
QUMFIO	2.631	2.631
QUMFIO	2.584	2.584
QUPSAW	2.553	2.522
QUPSAW	2.57	2.57
QUPSAW	2.599	2.599
QURPIC	2.605	2.605
RAHSEA	2.443	2.491
REZNEP	2.611	2.611
REZNEP	2.616	2.616
SAJZUA	2.538	2.538
SASBIX	2.608	2.623
SATMAC	2.613	2.613
SECLAP	2.614	2.614
SEFDOW	2.63	2.568
SEGGER	2.625	2.625
SEGGER	2.612	2.612
SEJVAH	2.566	2.566
SEPHEB	2.528	2.528
SEPHEB	2.561	2.561
SEPHEB	2.489	2.489
SEPHEB	2.589	2.589
SIBMUM	2.644	2.644
SIBMUM	2.634	2.634
SIBQEA	2.558	2.558
SIBQEA	2.577	2.577
SODCUJ	2.594	2.594
SODCUJ	2.582	2.582
SODCUJ01	2.575	2.575
SODCUJ01	2.583	2.583
SOMHUX	2.63	2.63
SOPRUL	2.568	2.664
SOPRUL	2.53	2.53
SUVZUF	2.567	2.567
SUVZUF	2.579	2.579
SUYXEQ	2.586	2.642
TANCIV	2.487	2.487
TANZOX	2.607	2.607
TEBMAQ	2.599	2.599
TECCOV	2.526	2.526
TIMFOL	2.512	2.512
TISSOE	2.582	2.68
TODNUV	2.603	2.603
TUVDEU	2.626	2.626
TUVDEU	2.616	2.616
TUVDEU	2.602	2.636
TUVDIY	2.56	2.56
TUVDOE	2.611	2.58
UGISEI01	2.598	2.598
UNAXIS	2.575	2.597
UPALON	2.637	2.637
UPALON01	2.645	2.645
UPALON02	2.642	2.642
UZUHOO	2.557	2.557
UZUHOO	2.567	2.567
VEFLOI	2.548	2.548
VEGKIB	2.59	2.59
VIDSOS	2.577	2.577
VIXLUL	2.557	2.557
VIXLUL	2.609	2.609
VUNSAZ	2.595	2.595
VUNSAZ01	2.585	2.585
VUNSAZ02	2.587	2.587
VUNSAZ03	2.585	2.585
WAVHOQ	2.557	2.557
WAZWAX	2.613	2.613
WEDZUC	2.496	2.496
WEFBIU	2.527	2.527
WEMYIX	2.571	2.571
WIGJIH	2.599	2.599
WIGJIH	2.6	2.6
WIGYES	2.61	2.61
WIGYES	2.584	2.584
WUJLAP	2.541	2.541
WUJLAP	2.564	2.564
WUMRUS	2.58	2.58
WUMRUS	2.609	2.609
WUWMIL	2.598	2.598
WUWMIL01	2.603	2.603
WUXGAX	2.513	2.513
XAFBAK	2.624	2.636
XAFBAK	2.605	2.62
XAFBAK	2.602	2.615
XAFBAK	2.598	2.643
XAHWUZ	2.558	2.558
XAPRUC	2.612	2.612
XAPRUC	2.55	2.55
XAQXAQ	2.636	2.636
XAQXAQ	2.592	2.627
XATXEV	2.519	2.519
XIBVEK	2.584	2.584
XITPUM	2.594	2.594
XITPUM	2.603	2.603
XITPUM01	2.604	2.604
XITPUM01	2.597	2.597
XOJKEO	2.598	2.598
XOWKOK	2.593	2.572
XOZBAQ	2.602	2.602
XOZHEB	2.512	2.519
XOZJOM	2.583	2.583
XOZJOM	2.529	2.529
XOZJOM01	2.506	2.506
XOZJOM01	2.564	2.564
XULJEV	2.517	2.539
XULJIZ	2.592	2.592
YADNAT	2.577	2.577
YALWUE	2.643	2.545
YEYDEM	2.585	2.585
YOWVAH	2.627	2.627
YOWVAH	2.574	2.574
YOWVEL	2.543	2.543
YOWWEM	2.595	2.595
YUBKIR	2.555	2.464
YUPVOV	2.531	2.531
ZASDIJ	2.577	2.577
ZASDIJ	2.541	2.541
ZASDOP	2.549	2.536
ZASDOP	2.582	2.52
ZASDOP	2.553	2.557
ZATNEP	2.644	2.644
ZATNEP	2.649	2.649
ZATNEP	2.647	2.647
ZATNEP	2.649	2.649
ZAYPAQ	2.583	2.583
ZAYPAQ01	2.595	2.595
ZEWZOT	2.6	2.6
ZIPDAG	2.615	2.62
ZIPDAG	2.68	2.659
ZIPDAG	2.6	2.596
ZIPDAG	2.629	2.615
ZISVAA	2.585	2.62
ZISVAA	2.585	2.585
ZISVAA	2.606	2.606
GIWWOB	2.542	2.542
CAPBIF	2.643	2.655
CICFOK	2.624	2.624
ELILUH	2.56	2.56
EXOZOG	2.525	2.525
FAXGUH	2.538	2.538
FELJIR	2.593	2.593
FIZKUV	2.721	2.721
GODJUE	2.67	2.67
HIFNEQ	2.617	2.617
HIFNEQ	2.592	2.592
HIFNEQ01	2.566	2.566
HIFNEQ01	2.603	2.603
HIHNET	2.523	2.523
HIHNET	2.523	2.523
HIHNIX	2.662	2.662
HIHNOD	2.674	2.674
IDAPEI	2.478	2.478
IDAPEI01	2.504	2.504
IDEYOF	2.845	2.845
IKEREV	2.51	2.51
IKEREV01	2.528	2.528
IKEREV02	2.574	2.574
IPOVAK	2.615	2.615
JEBDAW	2.651	2.651
KIJNOJ	2.655	2.655
LEJLUI	2.693	2.629
MAWSAF	2.539	2.539
MAWSAF	2.531	2.531
MUZCAL	2.64	2.64
OWOWAZ	2.554	2.554
PIRYIZ	2.484	2.484
PUJNEN	2.643	2.643
QUSLIA	2.617	2.617
RAPMUQ	2.581	2.581
REBTAU	2.662	2.662
SAVQUB	2.597	2.597
SAVQUB	2.612	2.612
TIJQEI	2.571	2.571
TIJQEI	2.57	2.57
TIJQEI01	2.569	2.572
TIJQEI02	2.571	2.571
TIJQEI02	2.571	2.571
ULIGIH	2.615	2.615
ULIGIH	2.624	2.624
WOJKIP	2.606	2.606
WONXUT	2.599	2.599
WONXUT	2.599	2.599
WONYUU	2.52	2.52
ZULVAF	2.557	2.557

## Sheet: HSO4
HSO4- (all structures)
CSD Refcode	DIST1	DIST2		Number of structures	73
HISMEE	2.602	2.602		Number of distances	156
HISMEE	2.628	2.628		Minimum	2.479
YIPWAY	2.646	2.646		Maximum	2.736
AJEQIP	2.616	2.616		Median	2.624
ASOXEN	2.559	2.645		Mean	2.62028
AXAMUI	2.664	2.664		Standard deviation (n-1)	0.0420886
AXEZUZ	2.594	2.594		SE of mean	0.00336979
AYICAM	2.607	2.607
BANMOU	2.612	2.612
BANMUA	2.631	2.631
BOYHOM	2.598	2.598
BUHBIP	2.614	2.614
CAMZUM	2.62	2.62
CUCYAB	2.693	2.693
CUDCIO	2.65	2.65
DAXWIK	2.736	2.736
DUJHAS	2.603	2.603
ESADEI	2.627	2.627
EYOROZ	2.59	2.59
EYORUF	2.63	2.63
FAGYAP	2.527	2.527
FAGYES	2.615	2.615
FEGNUB	2.591	2.58
FUQMOU01	2.567	2.64
GEHLEL	2.653	2.653
GEYWAL	2.695	2.695
GUHZAK	2.608	2.641
HAHGAZ	2.627	2.524
HIFCEH	2.613	2.613
IYEFAV	2.507	2.507
JAVHAS	2.692	2.692
JAYVOX01	2.642	2.642
JIZCEB	2.603	2.603
KAVGAS	2.637	2.637
KAVGAS01	2.634	2.634
KIDHEN	2.609	2.609
KOFWUZ	2.638	2.638
LIFPUO	2.647	2.647
LIFPUO01	2.657	2.657
LILHAP	2.592	2.592
LILHAP01	2.642	2.642
LOCKOE	2.671	2.671
LONHUS	2.669	2.669
MIHMOF	2.661	2.661
MODQUT	2.664	2.531
MOHKEB	2.623	2.623
MOHKEB	2.624	2.624
MOZWIH	2.542	2.581
MOZWON	2.618	2.618
NELSUS	2.59	2.602
NELSUS	2.628	2.649
NIFDOV	2.596	2.596
NIJWUB	2.657	2.657
NOZJOD	2.607	2.607
ODUDID	2.588	2.588
OGAQIZ	2.571	2.571
OGINIB	2.676	2.676
OMIXEN	2.678	2.678
PIWHEJ	2.609	2.609
POVQIC	2.479	2.479
QEGSED	2.551	2.607
QEGSIH	2.588	2.588
SAFGOV	2.629	2.629
SAFGOV	2.632	2.632
SIDKUM	2.61	2.61
SIDKUM	2.595	2.595
SUZYOB	2.632	2.632
TECTIF	2.605	2.605
VAVLAH	2.628	2.628
VEFMUR	2.567	2.567
VIGHEA	2.624	2.624
VUKRUP	2.574	2.574
VUKTEB	2.626	2.626
VUZGIH	2.641	2.641
XIBZUE	2.677	2.677
YAWJAH	2.615	2.615
YENLIP	2.653	2.653
YENLIP01	2.631	2.631

## Sheet: H2AsO4
H2AsO4- (all structures)
CSD Refcode	DIST1	DIST2		Number of structures	26
XIZPUU	2.634	2.634		Number of distances	64
XIZPUU	2.594	2.594		Minimum	2.544
AMINIT	2.629	2.588		Maximum	2.733
CENROD	2.65	2.65		Median	2.6065
FONFIY	2.618	2.618		Mean	2.61142
FONFIY	2.599	2.599		Standard deviation (n-1)	0.0416534
GELHIO10	2.628	2.544		SE of mean	0.00520668
GIXJAA	2.615	2.555
HALCOO	2.554	2.554
HATDIS	2.6	2.625
JAXQIJ	2.668	2.668
KORSAL01	2.67	2.643
LOCLAR	2.598	2.598
MOJNIK	2.596	2.584
OBUYOA	2.575	2.575
OBUYOA	2.676	2.676
OBUYOA01	2.679	2.679
OBUYOA01	2.571	2.571
ODEJEM	2.733	2.733
ODEJEM	2.639	2.639
POLLIN	2.589	2.589
SEZVOJ	2.6	2.6
SEZXOL	2.61	2.61
TEVPAM	2.621	2.621
TICBIR	2.554	2.554
VAMZOY	2.552	2.552
WEDDEP	2.571	2.571
WEDDEP	2.575	2.575
XAPWOB	2.603	2.603
XECJAR	2.616	2.616
XEPKOT	2.626	2.626
ZUZVUL	2.622	2.622

## Sheet: HSeO4
HSeO4- (all structures)
CSD Refcode	DIST1	DIST2		Number of structures	5
GUHZEO	2.595	2.646		Number of distances	12
OZEHOS	2.692	2.692		Minimum	2.595
OZEHOS	2.698	2.69		Maximum	2.698
XINBEB	2.674	2.674		Median	2.66
ZEBCAN	2.609	2.609		Mean	2.65158
ZEBCER	2.62	2.62		Standard deviation (n-1)	0.0390302
				SE of mean	0.011267

## Sheet: butanoic
butanoic (all structures)
CSD Refcode	DIST1	DIST2		Number of structures	279
LIKBEP	2.618	2.618		Number of distances	632
PITDII	2.626	2.626		Minimum	2.447
PITKOV	2.645	2.645		Maximum	2.98
PIZNIY	2.649	2.649		Median	2.653
RIMKOQ	2.647	2.647		Mean	2.65038
VILKOT	2.665	2.665		Standard deviation (n-1)	0.0322453
ZIYROR	2.683	2.623		SE of mean	0.00128265
ZIYRUX	2.633	2.682
ADEJAV	2.681	2.681
ADIPAC	2.642	2.642
ADIPAC04	2.649	2.649
ADIPAC05	2.671	2.671
ADIPAC05	2.672	2.668
ADIPAC06	2.649	2.649
ADIPAC07	2.656	2.656
ADIPAC08	2.653	2.653
ADIPAC09	2.656	2.656
ADIPAC11	2.651	2.651
ADIPAC12	2.64	2.64
ADIPAC12	2.642	2.642
ADIPAC13	2.651	2.651
ADIPAC14	2.654	2.654
ADIPAC15	2.657	2.657
ADIPAC16	2.653	2.653
ADIPAC17	2.662	2.662
ADIPAC18	2.658	2.658
ADIPAC19	2.656	2.656
ADIPAC20	2.657	2.657
ADIPAC21	2.652	2.652
ADIPAC22	2.658	2.658
ADIPAC23	2.647	2.647
AKILAH	2.635	2.635
ARUVEO	2.646	2.667
AWAKEO	2.636	2.676
AWAKEO	2.637	2.647
AXAGEN	2.656	2.656
AXIXAI	2.682	2.691
AXIXAI	2.613	2.686
AXIXEM	2.677	2.631
AXIXEM	2.673	2.74
AZELAC01	2.69	2.69
AZELAC03	2.658	2.658
AZELAC04	2.655	2.655
AZELAC05	2.661	2.661
AZELAC10	2.67	2.67
AZELAC11	2.673	2.673
AZELAC11	2.674	2.674
AZELAC12	2.661	2.661
AZELAC12	2.674	2.674
AZELAC13	2.664	2.664
AZELAC13	2.669	2.669
AZELAC14	2.662	2.662
AZELAC14	2.671	2.671
AZELAC15	2.662	2.662
AZELAC15	2.672	2.672
AZELAC16	2.663	2.663
AZELAC16	2.67	2.67
AZELAC17	2.656	2.656
AZUGUY	2.668	2.668
BECQAD	2.582	2.646
BENDAC	2.686	2.686
BINVIF	2.641	2.641
BRASAC10	2.665	2.665
CAMRIU02	2.447	2.447
CEVWAC	2.648	2.648
CEVWAC	2.65	2.65
CEVWAC01	2.623	2.623
CLAMBU	2.613	2.613
CUYKUC	2.659	2.659
DARWAU01	2.717	2.717
DECDAC02	2.653	2.653
DECDAC10	2.642	2.642
DEFNIL	2.653	2.653
DOSPAE	2.652	2.652
DOSQAF	2.668	2.668
DULVIP	2.664	2.664
ECPDTC	2.655	2.655
ECXUNT	2.665	2.665
ELENEQ	2.654	2.654
ENIBUZ	2.641	2.641
EPUKEH	2.632	2.632
EZOFOQ	2.584	2.6
EZOFOQ	2.602	2.602
FIVGOG	2.671	2.671
FOTFUR	2.637	2.637
FUGSOQ	2.589	2.589
FUPDIE	2.655	2.655
GAFYOB	2.662	2.662
GAFYOB	2.654	2.654
GAFYUH	2.642	2.642
GAFYUH	2.658	2.658
GASKEQ	2.639	2.639
GLURAC02	2.66	2.66
GLURAC03	2.664	2.664
GLURAC04	2.674	2.674
GLURAC06	2.632	2.632
GLURAC06	2.663	2.663
GLURAC07	2.644	2.644
GLURAC08	2.665	2.665
GLURAC09	2.662	2.662
GLURAC10	2.661	2.661
GLURAC11	2.656	2.656
GLURAC12	2.654	2.654
GLURAC13	2.667	2.667
GUDTUW	2.648	2.648
GUDVIM	2.677	2.677
GUWSAT	2.642	2.642
HEMFOX	2.643	2.643
HITSAG	2.663	2.663
HONVIP	2.624	2.624
INDBUA01	2.644	2.644
INDBUA02	2.68	2.68
ISENID	2.644	2.644
ISENOJ	2.653	2.653
ISENUP	2.631	2.631
ISEPAX	2.649	2.649
ISEPEB	2.629	2.629
ISEPEB01	2.638	2.638
IWOJEJ	2.613	2.613
IXUZIL	2.708	2.708
JAZCET	2.684	2.684
JEGYEA	2.656	2.669
JIDWEY01	2.692	2.692
JOBZUX	2.699	2.637
JOCBAG	2.647	2.638
JOLBES	2.729	2.729
KANCEI	2.665	2.665
KEBJIK	2.656	2.656
KEBJIK01	2.658	2.658
KEMCOV	2.668	2.645
KETHID	2.668	2.719
KIJBAG	2.663	2.663
KIXSOA	2.637	2.637
LAJXEA	2.653	2.653
LATQEE	2.654	2.654
LAURAC04	2.629	2.629
LAURAC05	2.628	2.628
LECKAG	2.628	2.628
LECKAG	2.666	2.643
LECKAG	2.626	2.626
LEJLOD	2.68	2.68
LERDOD	2.619	2.609
LETBIV	2.63	2.63
LEZYUL	2.643	2.662
LEZZAS	2.654	2.654
LEZZAS01	2.673	2.673
LEZZEW	2.654	2.654
LIMNUQ	2.626	2.626
LODCUE	2.597	2.62
LOFLUP	2.58	2.58
LUDGAT	2.611	2.611
LUFQAG	2.658	2.658
LUYXAE	2.63	2.63
LUYXEI	2.595	2.595
LUYYEJ	2.98	2.877
MEHPDA	2.625	2.625
MOFPEC	2.633	2.633
MOFPIG	2.639	2.639
MOFPOM	2.703	2.703
MOXVOL	2.682	2.682
MUXQOM	2.676	2.676
NAQNAX	2.656	2.656
NAQNUR	2.625	2.625
NATYIT	2.626	2.617
NIDKAM	2.657	2.657
NIJXEL	2.612	2.612
NIJXEL01	2.606	2.606
NISMEH	2.64	2.64
NISMEH	2.545	2.642
ODEJEN	2.666	2.666
OGUSUG	2.67	2.64
OHOGEY	2.64	2.64
OLECAC	2.638	2.638
OLECAC03	2.637	2.637
OLECAC03	2.655	2.655
OWAWAL	2.646	2.646
OXISTA	2.669	2.669
PEPMAA	2.629	2.629
PIMELA	2.678	2.678
PIMELA03	2.659	2.659
PIMELA04	2.659	2.659
PIMELA05	2.664	2.664
PIMELA05	2.665	2.665
PIMELA06	2.669	2.669
PIMELA07	2.657	2.657
PIMELA08	2.67	2.67
PIMELA08	2.666	2.666
PIMELA09	2.667	2.667
PIMELA09	2.663	2.663
PIMELA10	2.665	2.665
PIMELA10	2.663	2.663
PIMELA11	2.666	2.666
PIMELA11	2.662	2.662
PIMELA12	2.666	2.666
PIMELA12	2.66	2.66
PIMELA13	2.669	2.669
PIMELA13	2.66	2.66
PIMELA14	2.659	2.659
PIMELA15	2.657	2.657
POJWIV	2.638	2.638
PONXOH	2.629	2.629
POTFUA	2.658	2.668
QAJNAT	2.639	2.639
QEDVAY	2.657	2.657
QEGFIR	2.663	2.663
QOCNOM	2.633	2.633
REKCEP	2.664	2.664
REKCIT	2.649	2.649
REKDAM	2.665	2.665
REKDEQ	2.65	2.65
RIRPUD	2.634	2.634
RIWJUC	2.682	2.682
ROJCEA	2.667	2.667
RUFBAV	2.662	2.662
RUFBEZ	2.687	2.607
SEBAAC	2.639	2.639
SEBAAC03	2.641	2.641
SEBAAC04	2.635	2.635
SEBAAC05	2.647	2.647
SEBAAC06	2.65	2.65
SEBAAC07	2.646	2.646
SEBAAC08	2.644	2.644
SEBAAC09	2.644	2.644
SEBAAC10	2.639	2.639
SEBAAC11	2.637	2.637
SEBLET	2.64	2.64
SEBLET	2.649	2.649
SIGBIT	2.622	2.622
SIGCAM	2.613	2.613
SIGCAM	2.653	2.653
SILDUN	2.615	2.615
SOCMEE	2.64	2.64
STARAC05	2.67	2.67
STARAC06	2.681	2.681
STARAC07	2.67	2.67
STARAC08	2.64	2.64
SUBRAC	2.655	2.655
SUBRAC01	2.638	2.638
SUBRAC02	2.637	2.637
SUBRAC03	2.642	2.642
SUBRAC04	2.638	2.638
SUBRAC05	2.646	2.646
SUBRAC06	2.65	2.65
SUBRAC07	2.647	2.647
SUBRAC08	2.646	2.646
SUBRAC09	2.643	2.643
SUBRAC10	2.641	2.641
SUBRAC11	2.64	2.64
SUBRAC12	2.647	2.647
SUGYEZ	2.635	2.635
SURKOG	2.573	2.573
TICJAQ	2.667	2.667
TRDECA01	2.63	2.63
TRDECA02	2.536	2.536
TUDTUH	2.646	2.646
TUXZAN	2.618	2.618
UBAGAH	2.634	2.634
UJEGIZ	2.664	2.62
UKIWAN	2.686	2.686
ULUMEV	2.662	2.662
UMIQOY	2.662	2.662
UNDEAC10	2.669	2.669
UNDEAC11	2.657	2.657
UNDEAC12	2.67	2.67
UNDEAC12	2.66	2.66
URAHAX	2.587	2.667
VAGSOO	2.659	2.659
VAGVAD	2.632	2.632
VAMZIS	2.662	2.662
VAQGUR	2.659	2.659
VAQHAY	2.661	2.661
VAWNEP	2.624	2.62
VAWNEP	2.626	2.733
VAWNEP	2.655	2.668
VAWNEP	2.662	2.615
VAWNEP	2.671	2.619
VAWNEP	2.752	2.618
VEVPOD	2.709	2.709
VOXFUJ	2.675	2.675
VOXFUJ01	2.633	2.633
VOXFUJ01	2.662	2.662
VUKDAG	2.661	2.661
VUNYEI10	2.639	2.639
VUQZOX	2.683	2.647
WEGJUO	2.578	2.578
WEQJIO	2.676	2.676
WOLSUL	2.665	2.665
WOQBUZ	2.631	2.631
XATDEC	2.635	2.635
XATDIG	2.626	2.626
XIGVER	2.631	2.631
XOSWIN	2.66	2.66
XUNHIX	2.619	2.619
XUNHUJ	2.654	2.654
YAYXAY	2.649	2.649
YEFWEM	2.621	2.621
YEFWEM01	2.705	2.705
YEVMEU	2.647	2.647
YIBVEL	2.598	2.598
YIBVIP	2.695	2.695
YUQKEB	2.636	2.661
YUQKEB	2.642	2.642
ZELSOY	2.551	2.551
ZEMCEC	2.675	2.675
ZEMCIG	2.682	2.682
ZEMCOM	2.623	2.623
ZEMCUS	2.651	2.651
ZOXNOR	2.639	2.62
ZZZDDJ01	2.652	2.652
ZZZDDJ02	2.659	2.659
ZZZDDP01	2.633	2.633
ZZZDDP02	2.549	2.549
ZZZNCU01	2.67	2.67
ZZZNYY01	2.65	2.65
ZZZOEG02	2.627	2.627
ZZZOEG03	2.646	2.646

## Sheet: toluic
toluic (all structures)
CSD Refcode	DIST1	DIST2		Number of structures	321
FIVYIV	2.568	2.605		Number of distances	956
FIVYIV	2.555	2.601		Minimum	2.5
FIVYIV	2.558	2.58		Maximum	2.935
FIVYOB	2.59	2.59		Median	2.623
FIVYOB	2.646	2.579		Mean	2.62703
FIVYOB	2.573	2.54		Standard deviation (n-1)	0.0399712
FIVYOB	2.577	2.577		SE of mean	0.00129276
FIVYOB	2.565	2.637
FIVYOB	2.636	2.605
GIWPOU	2.624	2.596
GIWPOU	2.594	2.664
GIWPOU	2.694	2.659
GIWPUA	2.612	2.612
GIWQAH	2.766	2.67
GIWQAH	2.631	2.602
GIWQAH	2.68	2.606
GIWSUD	2.608	2.608
KIXKAG	2.62	2.62
MIQLEG	2.573	2.588
MIQLEG	2.591	2.554
MIQLEG01	2.592	2.61
MIQLEG01	2.628	2.602
MIQLEG02	2.618	2.586
MIQLEG02	2.675	2.604
NINDOG	2.653	2.653
NIRRUE	2.653	2.653
NIRSAL	2.661	2.661
ZOBFUU	2.609	2.609
ZOBFUU	2.623	2.623
ADAFEQ	2.614	2.614
ADAFIU	2.615	2.615
ADUCIO	2.602	2.602
AHIBID	2.686	2.562
AJIYAV	2.673	2.573
AJIYAV	2.669	2.669
AJOKOA	2.592	2.592
AXIXIQ	2.618	2.579
AXIXIQ	2.676	2.597
BARQAP	2.598	2.598
BASFEJ	2.602	2.602
BASFEJ	2.699	2.699
BERNIY	2.615	2.615
BONLOF	2.613	2.691
BONLOF	2.616	2.642
BOPSEE11	2.6	2.633
BOPSEE11	2.62	2.62
BTCRBZ	2.646	2.646
CAHNEH	2.635	2.635
CAHYUF	2.648	2.648
CASXOL	2.611	2.611
CASYAY	2.638	2.638
CEHLUY	2.643	2.643
CELWAT	2.613	2.613
CELWAT	2.642	2.647
CIHWUN	2.614	2.614
CIKFOT	2.69	2.563
CIKFUZ	2.681	2.563
CIKGAG	2.682	2.562
CIKGEK	2.693	2.569
CIKGIO	2.692	2.571
CIKGOU	2.69	2.571
CIKGUA	2.689	2.563
CIKHAH	2.697	2.572
CIPKIW	2.629	2.629
CPCOAC	2.517	2.517
CUGWAC	2.667	2.667
CURLAE	2.645	2.645
CURLAE	2.647	2.647
CUXZUR	2.631	2.631
DAQCII	2.659	2.659
DAQCOO	2.658	2.658
DECGUO	2.622	2.705
DEFHEB	2.621	2.621
DEPGIO	2.615	2.615
DIRMEY	2.617	2.617
DISVAE	2.619	2.619
DISVEI	2.607	2.607
DIZCOG	2.614	2.614
DOCLIQ	2.662	2.558
DOCLIQ	2.666	2.666
DOYJEH	2.599	2.631
DOYJEH	2.611	2.611
DOYJEH	2.613	2.626
DOYJEH	2.614	2.614
DOYJEH	2.616	2.605
DOYJEH	2.621	2.621
DOYJIL	2.627	2.638
DOYJOR	2.609	2.609
DOYJOR	2.646	2.646
DOYJUX	2.598	2.598
DOYJUX	2.625	2.625
DOYKAE	2.599	2.599
DOYKAE	2.606	2.606
DUDGEP	2.642	2.642
DUHXUA	2.616	2.616
EBOMEO	2.64	2.64
EBOMIS	2.602	2.661
ELERUK	2.625	2.625
ELERUK01	2.614	2.614
EMOGAQ	2.62	2.62
EVIZAM01	2.626	2.626
EVIZAM01	2.632	2.632
EVOZUK	2.609	2.609
FAHPIQ	2.63	2.63
FAHPOW	2.625	2.625
FAMYOK	2.612	2.59
FAYVEI	2.635	2.635
FILDOU	2.596	2.6
FLBIPC10	2.623	2.623
FONPOP	2.605	2.605
FUPDUQ	2.633	2.633
GAKMIP	2.652	2.652
GANWIE	2.622	2.622
GERFUE	2.634	2.634
GIPHAP	2.609	2.609
GIPHAP	2.612	2.612
GIPHET	2.639	2.639
GUVWIF	2.653	2.653
HALXOK	2.575	2.692
HICXUP	2.601	2.638
HOPJIF	2.574	2.644
IBPCHA	2.616	2.616
IBPHCA	2.6	2.6
ICOKAO	2.616	2.616
ICOKUI	2.615	2.608
IDOKEU	2.661	2.63
IFEBUT	2.682	2.728
IFECEE	2.601	2.601
IKERAT	2.642	2.642
IRIBOC	2.595	2.595
IRIBUI	2.615	2.615
ISAGEP	2.621	2.621
IWAVIN	2.633	2.633
IYIFIG	2.655	2.655
JAHNIQ	2.631	2.631
JAHNUC	2.626	2.626
JEJHAK	2.634	2.634
JEJHAK	2.657	2.657
JESREF	2.677	2.677
JICTAT	2.591	2.634
JICTEX	2.612	2.575
JODPIC	2.619	2.619
JUBZUD	2.619	2.619
JUCBAM	2.613	2.613
JUKBEY	2.612	2.612
JUXHUH	2.65	2.562
KACFUS	2.598	2.598
KACFUS	2.72	2.72
KACNIO	2.626	2.626
KACNOU	2.616	2.616
KACZAS	2.64	2.64
KASRIH	2.609	2.657
KASRIH	2.599	2.638
KAZTOX	2.62	2.62
KUPWID	2.623	2.623
LAXDAR	2.64	2.617
LAXDAR	2.581	2.63
LAXDAR	2.708	2.6
LETBUI	2.596	2.66
LOJQIK	2.62	2.62
LOJQUW	2.649	2.649
LOJRAD	2.63	2.63
LOJREH	2.629	2.629
LOJROR	2.631	2.631
LOJRUX	2.656	2.656
LORTOC	2.619	2.619
MAVNIJ	2.621	2.621
MAZBAQ	2.648	2.648
MEBKAI	2.644	2.628
MEBKEM	2.598	2.665
MEBKEM	2.693	2.566
MEBKEM	2.598	2.661
MEBKIQ	2.612	2.639
MEFPAR	2.605	2.605
MEGJEO01	2.629	2.629
MEHCIN	2.608	2.608
MEZNIR	2.646	2.646
MIDDAG	2.637	2.579
MIDDAG	2.627	2.568
MIDDAG	2.678	2.586
MISKAB	2.669	2.669
MOCMEX	2.602	2.602
MOJYAN	2.599	2.599
MOPSIU	2.652	2.652
MOYNOF	2.597	2.597
MOYNOF	2.612	2.612
MOYNOF	2.668	2.606
MOYNOF	2.61	2.601
MOYNOF	2.607	2.626
MOYNUL	2.61	2.61
MOYPAT	2.568	2.669
MOYPAT	2.647	2.603
MOYPAT	2.622	2.593
MOYPEX	2.614	2.628
MOYPIB	2.61	2.605
MOYPIB	2.647	2.59
MOYPIB	2.677	2.677
MOYPIB	2.828	2.679
MOYPIB	2.571	2.628
MOYPOH	2.591	2.606
MOYPOH	2.623	2.618
MOYPOH	2.625	2.615
MOYPOH	2.6	2.636
MOYPOH	2.617	2.617
MOYPOH	2.631	2.601
MOYPOH	2.609	2.596
MOYPOH	2.615	2.631
MOYPOH	2.636	2.64
MOYPUN	2.613	2.638
MOYPUN	2.614	2.564
MOYQAU	2.64	2.569
MOYQAU	2.601	2.609
MOYQEY	2.635	2.567
MOYQEY	2.618	2.606
MOZBAF	2.605	2.605
NEKWAE	2.624	2.624
NEMXOT	2.591	2.635
NENGAQ	2.627	2.627
NIGNAT	2.684	2.604
NIGNAT	2.594	2.661
NOKBUL	2.617	2.657
NUCBAQ	2.627	2.627
NUCJAX	2.615	2.615
OCITOM	2.935	2.935
OCIYEF	2.633	2.619
OCIYEF	2.568	2.687
OCIYEF01	2.615	2.615
OCIYEF01	2.616	2.616
OGUROZ01	2.597	2.639
OGUROZ01	2.602	2.602
OGUROZ01	2.604	2.626
OGUROZ01	2.623	2.597
OGUROZ01	2.624	2.598
OGUROZ01	2.636	2.596
OGUROZ01	2.635	2.608
OGUROZ01	2.602	2.632
OGUROZ01	2.628	2.604
OGUROZ01	2.601	2.627
OGUROZ01	2.604	2.655
OGUROZ01	2.612	2.611
OGUROZ01	2.632	2.588
OGUROZ01	2.664	2.597
OGUROZ01	2.606	2.618
OGUROZ01	2.619	2.62
OGUROZ01	2.634	2.579
OGUROZ01	2.635	2.594
OGUROZ01	2.646	2.61
OGUROZ01	2.594	2.638
OGUROZ01	2.598	2.613
OMEVUZ	2.563	2.737
OMEVUZ	2.62	2.606
OMEVUZ	2.565	2.816
OMEVUZ	2.646	2.649
OMEVUZ	2.634	2.578
OMEVUZ	2.66	2.574
OMEWAG	2.697	2.551
OMEWAG	2.589	2.697
OMEWAG	2.624	2.634
OPENAZ	2.631	2.623
ORAGEV	2.639	2.62
ORAGEV	2.575	2.668
ORAGIZ	2.622	2.69
ORAGIZ	2.609	2.639
ORAGIZ	2.631	2.602
ORAGUL	2.588	2.623
ORAGUL	2.639	2.603
OSEXUG	2.623	2.623
OVOSOI	2.623	2.632
OVOSUO	2.611	2.611
OVOTAV	2.632	2.573
PABQUG	2.615	2.607
PAPKUO	2.628	2.605
PAPLAV	2.637	2.621
PAPLEZ	2.656	2.645
PAPLID	2.617	2.633
PAPLOJ	2.629	2.633
PAPLUP	2.612	2.614
PAPMAW	2.649	2.644
PAPMEA	2.628	2.618
PAPMOK	2.629	2.641
PAPMUQ	2.641	2.655
PAPNAX	2.627	2.622
PAPNEB	2.64	2.639
PAPNIF	2.622	2.628
PAPNOL	2.61	2.629
PAPNOL	2.641	2.626
PAPNOL	2.642	2.605
PEQGEA	2.574	2.665
PEXLIN	2.621	2.621
PEXLOT	2.59	2.647
PIDTII	2.556	2.556
PIDTII	2.666	2.674
PIVKEL	2.64	2.64
POLBOJ	2.706	2.706
POLBUP	2.614	2.629
PTOLIC01	2.625	2.625
PUQMAP	2.637	2.637
PUQMAP01	2.646	2.646
PUQMAP02	2.638	2.638
PUQMAP03	2.646	2.646
PUQMET	2.619	2.619
PUQMET01	2.619	2.619
PUYZAK	2.643	2.643
PUZLAX	2.619	2.619
QAJPAV	2.61	2.61
QAXFOM	2.588	2.588
QAXFOM	2.611	2.611
QEVTET	2.636	2.618
QEVTIX	2.584	2.646
QEVTOD	2.633	2.633
QUDVIV	2.548	2.548
QUDVUH	2.623	2.623
QUQQOK	2.569	2.679
QUQQOK	2.58	2.668
QUQQOK	2.664	2.685
QUQQOK01	2.564	2.67
QUQQOK01	2.621	2.66
QUQQOK01	2.643	2.573
QUQQOK01	2.656	2.523
QUQQOK01	2.546	2.636
QUQQOK01	2.605	2.659
QUQRAX	2.621	2.636
QUQRAX	2.723	2.88
QUQRAX	2.684	2.594
QUQRAX	2.632	2.618
QUQRAX	2.618	2.606
QUQRAX	2.61	2.689
QUQREB	2.624	2.624
QUQRIF	2.639	2.651
QUQRIF	2.61	2.639
QUQRIF	2.615	2.63
QUQRIF	2.661	2.641
QUQROL	2.602	2.647
QUQROL	2.662	2.625
QUQROL	2.658	2.621
QUQROL	2.672	2.616
QUQROL	2.614	2.645
QUQROL	2.624	2.645
RANKUP	2.622	2.622
RASDEV	2.635	2.635
REMVIR	2.654	2.628
REMVIR	2.56	2.652
REMVIR	2.649	2.592
REMVOX	2.641	2.61
REMVOX	2.611	2.619
REMVOX	2.657	2.6
REMVOX01	2.53	2.578
REMVOX01	2.78	2.532
REMVOX01	2.788	2.751
RIGJAT	2.626	2.626
RIJHEA	2.64	2.64
RIJHIE	2.628	2.628
RIJHOK	2.631	2.631
RIJJEC	2.823	2.823
RIYZIJ	2.61	2.61
RUNGUE	2.643	2.643
RUNXIJ	2.611	2.599
RUNXIJ	2.593	2.661
SABCOQ	2.617	2.617
SABCUW	2.64	2.596
SABCUW	2.635	2.627
SABCUW	2.627	2.624
SABCUW	2.615	2.59
SABDAD	2.543	2.5
SABDAD	2.652	2.73
SABDAD	2.567	2.633
SABDEH	2.592	2.62
SABDEH	2.617	2.617
SABDIL	2.573	2.678
SABDOR	2.562	2.669
SABDUX	2.708	2.612
SABDUX	2.548	2.534
SABDUX	2.559	2.627
SANBER	2.578	2.578
SAPVIP	2.618	2.618
SAPVOV	2.616	2.616
SATQAF	2.649	2.649
SEDDUD	2.623	2.623
SEDDUD	2.642	2.642
SIRJAG	2.604	2.604
SUCHUV	2.617	2.617
SULBIL	2.646	2.646
SULBOR	2.629	2.628
TAMLUP	2.629	2.629
TAWTIX	2.642	2.642
TAWTIX01	2.68	2.68
TAWTIX02	2.64	2.64
TEDLUL	2.616	2.616
TEDMAS	2.62	2.62
TEPHTH	2.608	2.608
TEPHTH12	2.62	2.62
TEPHTH14	2.617	2.617
TEPHTH15	2.625	2.625
TEPHTH16	2.627	2.627
TEPHTH17	2.626	2.626
TEPHTH18	2.625	2.625
TEWKOW	2.731	2.731
TIHLIG	2.618	2.618
TISLUE	2.626	2.626
TISLUE	2.642	2.642
TISMEP	2.593	2.593
TISMEP	2.595	2.621
TIWCEI	2.628	2.628
TIWCIM	2.646	2.646
TUCCEB	2.628	2.628
TUHZON	2.635	2.635
TUPNOI	2.603	2.661
TUPNOI01	2.667	2.651
TUPNOI01	2.642	2.646
TUPPUR	2.625	2.625
UCAQAT	2.65	2.637
UCAQAT	2.575	2.629
UDAMIY	2.598	2.598
UDICIW	2.589	2.676
UFUVEZ	2.603	2.603
UHUQOE	2.584	2.696
ULUSID	2.624	2.603
UNIWEV	2.621	2.621
UQACUM	2.603	2.692
UQACUM	2.612	2.612
UQACUM	2.624	2.624
VATMUB	2.63	2.63
VEQWOF	2.635	2.635
VIHCOH	2.596	2.596
WAQVER	2.634	2.634
WEGNUT	2.631	2.631
WEGPAB	2.63	2.63
WIRKEP	2.607	2.607
WIRKUF	2.682	2.576
WIRKUF	2.629	2.692
WIRKUF	2.694	2.639
WIRKUF	2.626	2.575
WIZXUZ	2.624	2.624
WOGWOF	2.632	2.632
WUJJUH	2.637	2.637
WUJJUH	2.619	2.619
WURLEB	2.63	2.63
WUVJOO	2.765	2.617
WUVJOO	2.697	2.545
XAWYUS	2.624	2.624
XAYFEI	2.604	2.604
XAYFEI01	2.611	2.611
XEDFUJ	2.643	2.634
XEDGAQ	2.611	2.62
XEDGAQ	2.629	2.614
XESSEW	2.709	2.671
XESSEW	2.664	2.599
XESSEW	2.615	2.696
XESSEW	2.639	2.633
XESSIA	2.564	2.652
XESSIA	2.597	2.597
XIBLEZ	2.601	2.601
XIBLEZ	2.7	2.635
XIYROM	2.541	2.776
XIYRUS	2.616	2.616
XOHFAC	2.622	2.622
XUKLIA	2.645	2.64
XUMZIP	2.611	2.611
XUSZIV	2.634	2.634
XUSZUH	2.617	2.617
YADTAZ	2.781	2.781
YAMNEI	2.639	2.581
YATKIQ	2.666	2.666
YEJPEJ	2.617	2.633
YEJPIN	2.607	2.633
YELWOE	2.661	2.661
YEQPOC01	2.655	2.655
YOCPUD	2.564	2.697
YUWSEP	2.647	2.647
ZARXOI	2.61	2.625
ZARXUO	2.587	2.63
ZARXUO	2.59	2.635
ZARYAV	2.625	2.625
ZARYAV	2.636	2.636
ZESMIV	2.65	2.65
ZESMIV	2.663	2.663
ZIKWOF	2.62	2.62
ZOKCAF	2.618	2.618

## Sheet: HPO4
HPO4 2- (all structures)
CSD Refcode	DIST1	DIST2		Number of structures	4
FUJPEF	2.529	2.529		Number of distances	8
IKEZAZ01	2.621	2.621		Minimum	2.529
SITHEI	2.658	2.658		Maximum	2.658
IHUDUK	2.53	2.53		Median	2.5755
				Mean	2.5845
				Standard deviation (n-1)	0.0604389
				SE of mean	0.0213684

## Sheet: HAsO4
HAsO4 2- (all structures)
CSD Refcode	DIST1	DIST2		Number of structures	12
AZODUO	2.693	2.693		Number of distances	34
AZODUO	2.616	2.616		Minimum	2.531
BEDNAA	2.61	2.61		Maximum	2.733
INEBUY	2.632	2.632		Median	2.6165
JAXMUR	2.679	2.679		Mean	2.61291
JETSEH	2.531	2.531		Standard deviation (n-1)	0.0483305
JETSEH01	2.557	2.557		SE of mean	0.00828862
JETSEH02	2.541	2.541
JIWKOQ	2.613	2.623
JIWKOQ	2.733	2.543
JIWKOQ	2.62	2.609
LOXROF	2.617	2.617
LOXROF	2.597	2.597
WEZZAC	2.636	2.636
WEZZAC	2.636	2.636
WOJQOD	2.579	2.579
YASGUV	2.625	2.625
